# Supplementary material for: Early Markers of Cardiovascular Disease Associated With Clinical Data and Autosomal Ancestry in Patients With Type 1 Diabetes: A Cross-sectional Study in an Admixed Brazilian Population.
Source: Research Square preprint supplement (doi:10.21203/rs.3.rs-1215441/v1), 2022-01-06
Supplement: Supplementary file 1 [file 6099da7e99e2680c1b55be5d.docx]

**Supplementary Information**

**
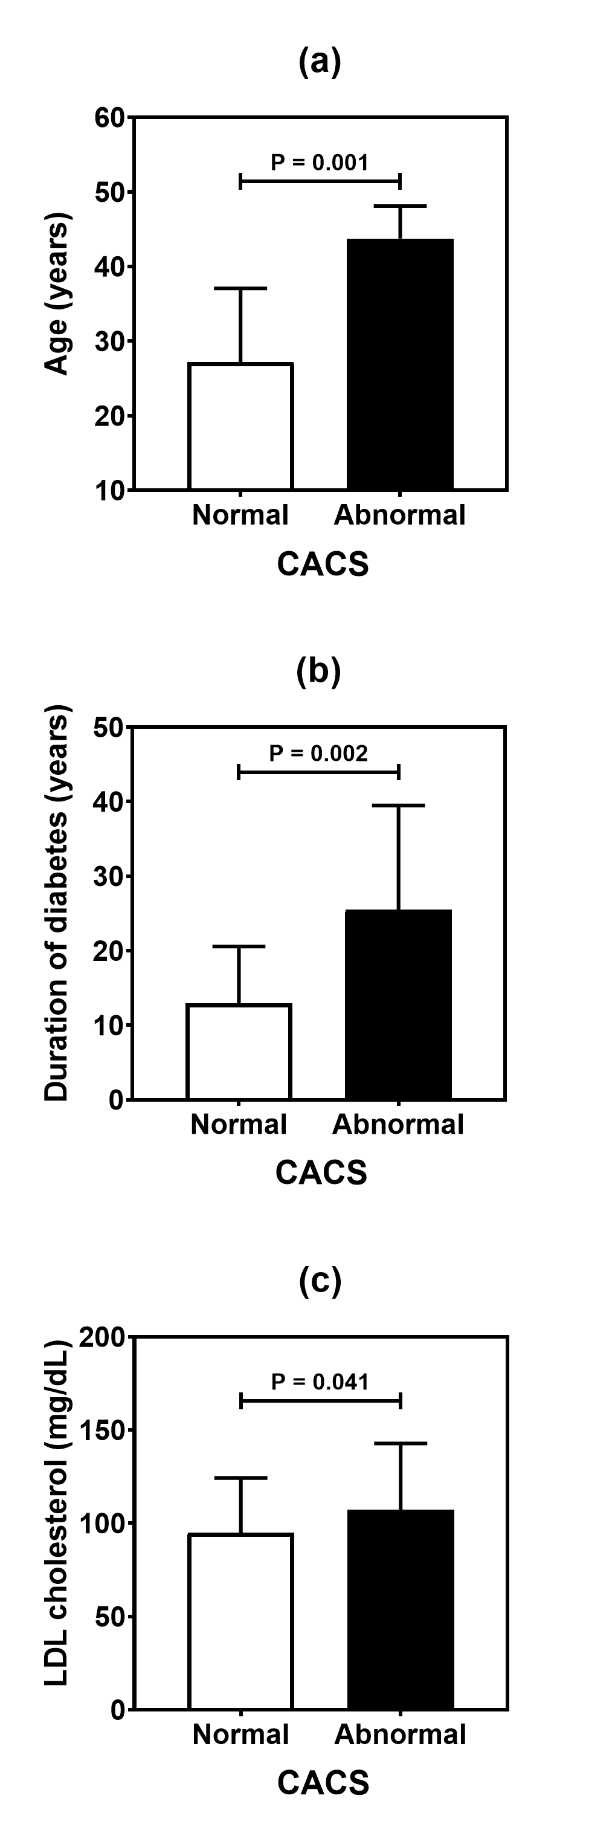
**

**Additional file 1: Fig. S1.** Comparative analysis of age (a), duration of diabetes (b), and LDL (low-density lipoprotein) cholesterol level (c) in type 1 diabetes patients according to CACS (coronary artery calcium score).


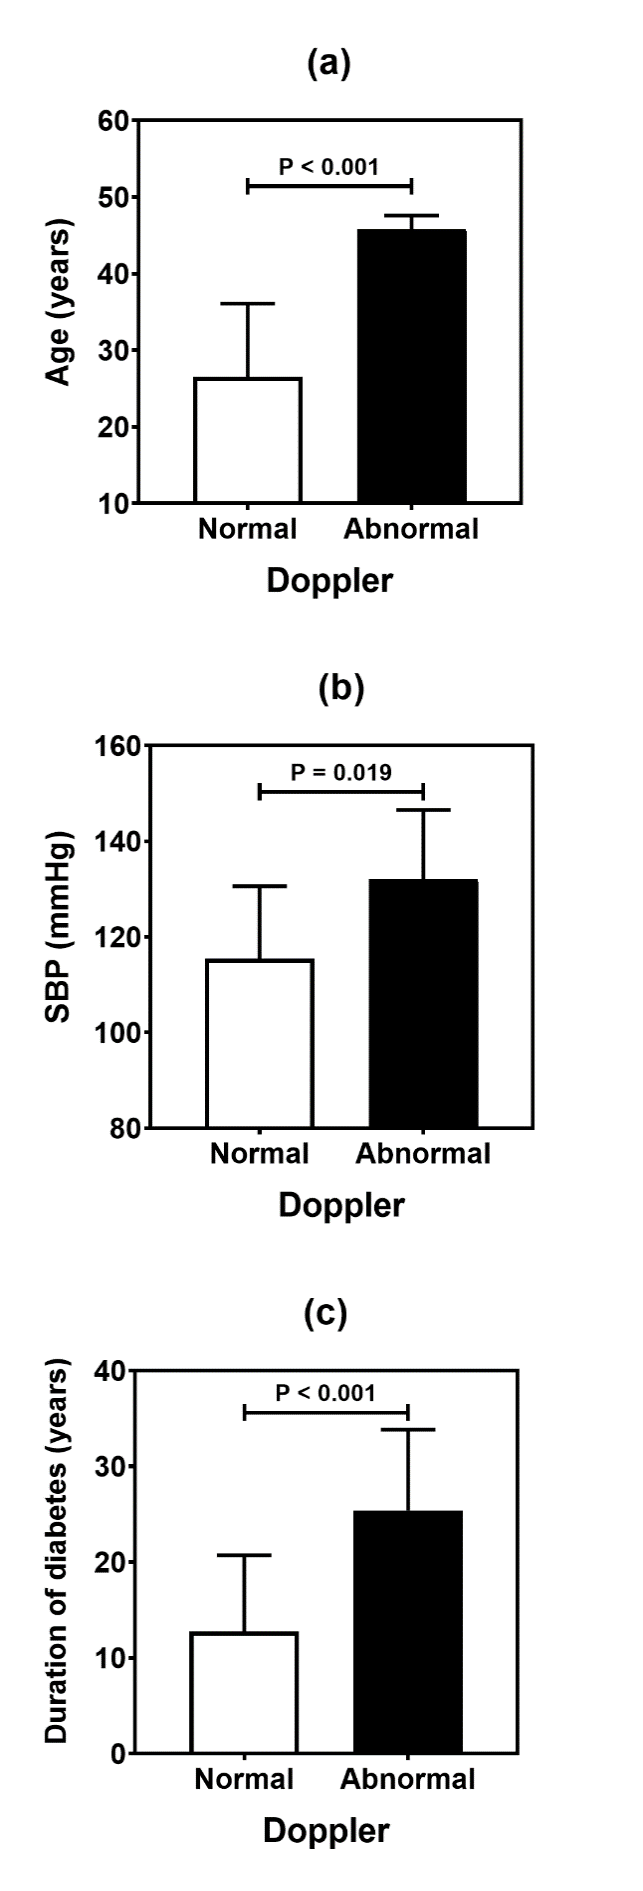


**Additional file 1: Fig. S2.** Comparative analysis (mean and standard deviation) of age (a), SBP (Systolic blood pressure) (b), and duration of diabetes (c) in type 1 diabetes patients according to carotid Doppler sonography.


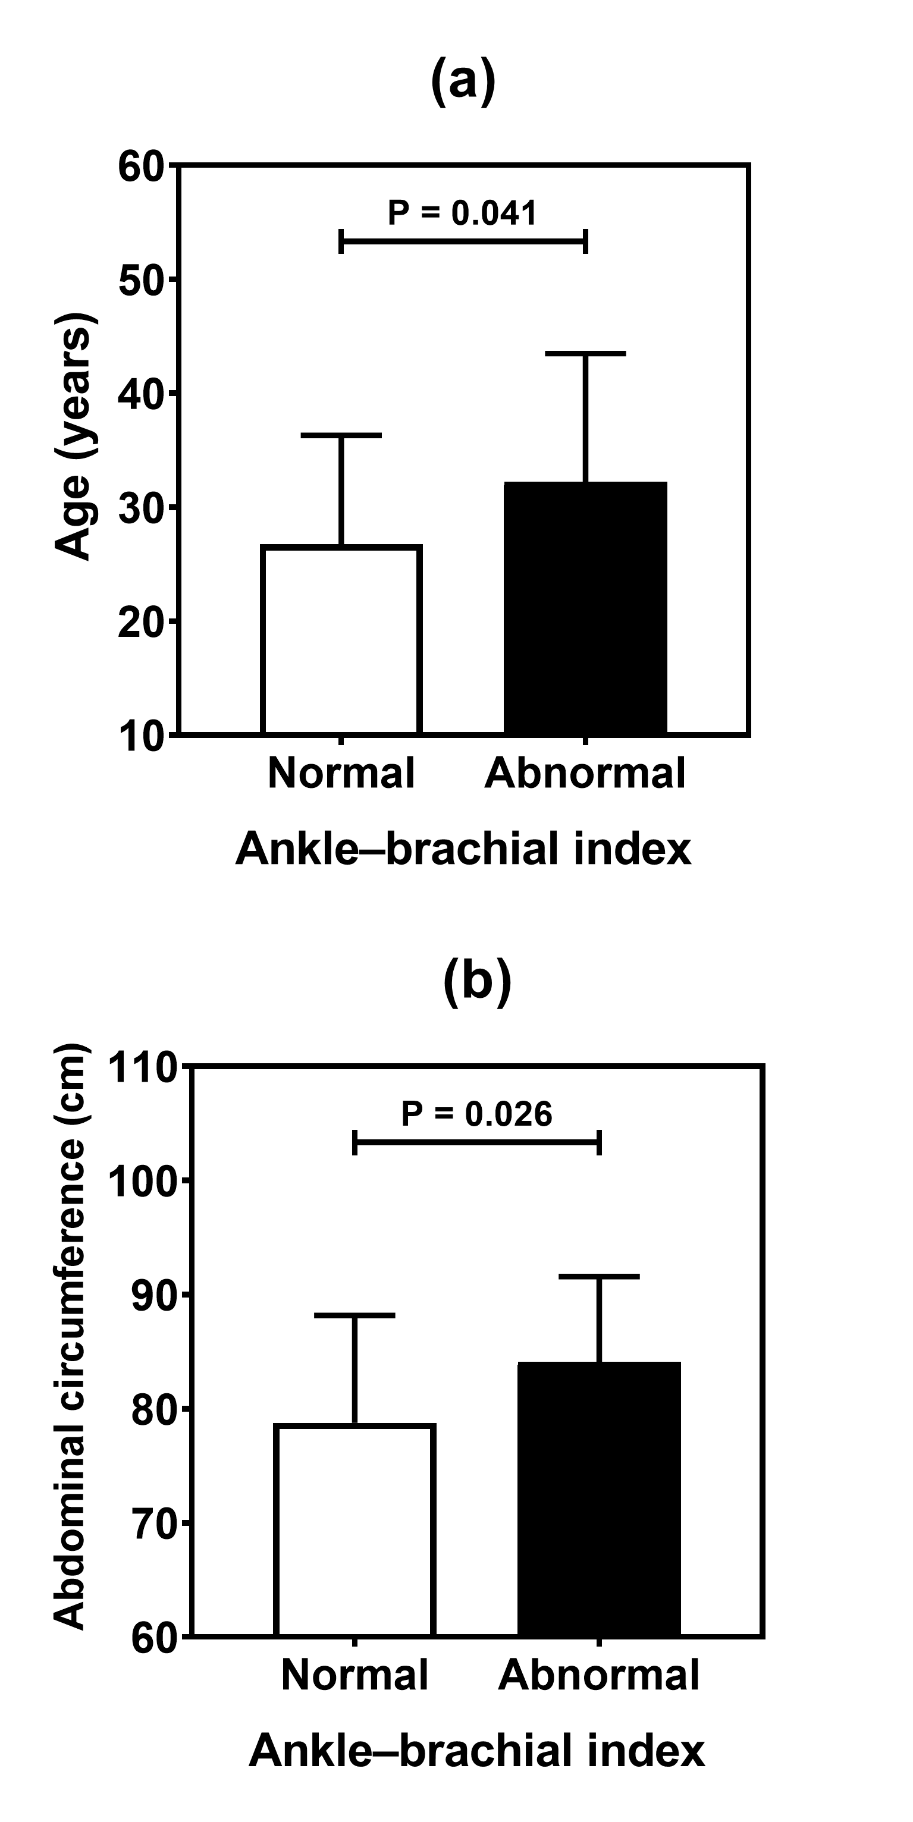


**Additional file 1: Fig. S3.** Comparative analysis (mean and standard deviation) of age (a), and abdominal circumference (b) in type 1 diabetes patients according to ankle-brachial index.

**Additional file 1: Table S1** Results of comparison tests (p values) of autosomal ancestry data in individuals with type 1 diabetes according to cardiovascular evaluation.

| **Variables** | **Cardiovascular abnormalities** | | |
| --- | --- | --- | --- |
| **CACS** | **Doppler** | **ABI** |
| ***p value*** | ***p value*** | ***p value*** |
| **Autosomal ancestry** |  |  |  |
| Amerindian | 0.222 | 0.795 | 0.765 |
| European | 0.383 | 0.481 | 0.234 |
| African | 0.688 | 0.801 | 0.636 |
| *CACS* Coronary artery calcium score (Normal versus Abnormal). *Doppler* Carotid Doppler sonography (Normal versus Abnormal). *ABI* Ankle–brachial index (Normal versus Abnormal). | | | |
